# Supplementary material for: Targeting the HIV-infected brain to improve ischemic stroke outcome
Source: PubMed Central journal article supplement (PMC6494822; doi:10.1038/s41467-019-10046-x), 2019-05-01
Supplement: 41467_2019_10046_MOESM3_ESM.pdf [file 41467_2019_10046_MOESM3_ESM.pdf]

## Reporting Summary

Nature Research wishes to improve the reproducibility of the work that we publish. This form provides structure for consistency and transparency in reporting. For further information on Nature Research policies, see [Authors & Referees](#) and the [Editorial Policy Checklist](#).

### Statistics

For all statistical analyses, confirm that the following items are present in the figure legend, table legend, main text, or Methods section.

n/a Confirmed

- |                                     |                                     |                                                                                                                                                                                                                                                            |
|-------------------------------------|-------------------------------------|------------------------------------------------------------------------------------------------------------------------------------------------------------------------------------------------------------------------------------------------------------|
| <input type="checkbox"/>            | <input checked="" type="checkbox"/> | The exact sample size ( $n$ ) for each experimental group/condition, given as a discrete number and unit of measurement                                                                                                                                    |
| <input type="checkbox"/>            | <input checked="" type="checkbox"/> | A statement on whether measurements were taken from distinct samples or whether the same sample was measured repeatedly                                                                                                                                    |
| <input type="checkbox"/>            | <input checked="" type="checkbox"/> | The statistical test(s) used AND whether they are one- or two-sided<br><i>Only common tests should be described solely by name; describe more complex techniques in the Methods section.</i>                                                               |
| <input checked="" type="checkbox"/> | <input type="checkbox"/>            | A description of all covariates tested                                                                                                                                                                                                                     |
| <input checked="" type="checkbox"/> | <input type="checkbox"/>            | A description of any assumptions or corrections, such as tests of normality and adjustment for multiple comparisons                                                                                                                                        |
| <input checked="" type="checkbox"/> | <input type="checkbox"/>            | A full description of the statistical parameters including central tendency (e.g. means) or other basic estimates (e.g. regression coefficient) AND variation (e.g. standard deviation) or associated estimates of uncertainty (e.g. confidence intervals) |
| <input checked="" type="checkbox"/> | <input type="checkbox"/>            | For null hypothesis testing, the test statistic (e.g. $F$ , $t$ , $r$ ) with confidence intervals, effect sizes, degrees of freedom and $P$ value noted<br><i>Give <math>P</math> values as exact values whenever suitable.</i>                            |
| <input checked="" type="checkbox"/> | <input type="checkbox"/>            | For Bayesian analysis, information on the choice of priors and Markov chain Monte Carlo settings                                                                                                                                                           |
| <input checked="" type="checkbox"/> | <input type="checkbox"/>            | For hierarchical and complex designs, identification of the appropriate level for tests and full reporting of outcomes                                                                                                                                     |
| <input checked="" type="checkbox"/> | <input type="checkbox"/>            | Estimates of effect sizes (e.g. Cohen's $d$ , Pearson's $r$ ), indicating how they were calculated                                                                                                                                                         |

*Our web collection on [statistics for biologists](#) contains articles on many of the points above.*

### Software and code

Policy information about [availability of computer code](#)

Data collection

*Provide a description of all commercial, open source and custom code used to collect the data in this study, specifying the version used OR state that no software was used.*

Data analysis

*Provide a description of all commercial, open source and custom code used to analyse the data in this study, specifying the version used OR state that no software was used.*

For manuscripts utilizing custom algorithms or software that are central to the research but not yet described in published literature, software must be made available to editors/reviewers. We strongly encourage code deposition in a community repository (e.g. GitHub). See the Nature Research [guidelines for submitting code & software](#) for further information.

### Data

Policy information about [availability of data](#)

All manuscripts must include a [data availability statement](#). This statement should provide the following information, where applicable:

- Accession codes, unique identifiers, or web links for publicly available datasets
- A list of figures that have associated raw data
- A description of any restrictions on data availability

The source data underlying Figures 1 to 8 and Supplementary Figure 3 are provided as a Supplementary Source Data file. All other data supporting the findings of this manuscript are available from the corresponding authors upon reasonable request.

## Field-specific reporting

Please select the one below that is the best fit for your research. If you are not sure, read the appropriate sections before making your selection.

Life sciences     Behavioural & social sciences     Ecological, evolutionary & environmental sciences

For a reference copy of the document with all sections, see [nature.com/documents/nr-reporting-summary-flat.pdf](https://nature.com/documents/nr-reporting-summary-flat.pdf)

## Life sciences study design

All studies must disclose on these points even when the disclosure is negative.

|                 |                                                                                                                                                                                                                                                                                                                                                                                                                                                                                                                                                                               |
|-----------------|-------------------------------------------------------------------------------------------------------------------------------------------------------------------------------------------------------------------------------------------------------------------------------------------------------------------------------------------------------------------------------------------------------------------------------------------------------------------------------------------------------------------------------------------------------------------------------|
| Sample size     | Sample sizes were extrapolated from results obtained from a previously published study from which group means and variance were established. Using a power analysis we determined that a total of 12 animals per groups would be necessary to obtain significantly different results. Experiments were conducted with 6 animals per group at the time given the complex surgical methods involved. Experiments were repeated at least twice. Sample numbers were then re-evaluated (Significance: No repeats; Close to significance: Repeat; No change observed: No repeats.) |
| Data exclusions | Some samples were omitted on the basis of a failed surgery. The MCAO technique has about 85-90% success rate; if an animal did not develop ischemic-stroke, it was removed from the study. No other exclusion was performed.                                                                                                                                                                                                                                                                                                                                                  |
| Replication     | Experiment were replicated at least twice, usually three times. All presented data is from independent replicates.                                                                                                                                                                                                                                                                                                                                                                                                                                                            |
| Randomization   | Animal allocation to experimental groups was done randomly.                                                                                                                                                                                                                                                                                                                                                                                                                                                                                                                   |
| Blinding        | Behavior and neurodeficit evaluation was performed using numbered cages with no indication of study groups.                                                                                                                                                                                                                                                                                                                                                                                                                                                                   |

## Reporting for specific materials, systems and methods

We require information from authors about some types of materials, experimental systems and methods used in many studies. Here, indicate whether each material, system or method listed is relevant to your study. If you are not sure if a list item applies to your research, read the appropriate section before selecting a response.

### Materials & experimental systems

| n/a                                 | Involvement in the study                                        |
|-------------------------------------|-----------------------------------------------------------------|
| <input type="checkbox"/>            | <input checked="" type="checkbox"/> Antibodies                  |
| <input checked="" type="checkbox"/> | <input type="checkbox"/> Eukaryotic cell lines                  |
| <input checked="" type="checkbox"/> | <input type="checkbox"/> Palaeontology                          |
| <input type="checkbox"/>            | <input checked="" type="checkbox"/> Animals and other organisms |
| <input checked="" type="checkbox"/> | <input type="checkbox"/> Human research participants            |
| <input checked="" type="checkbox"/> | <input type="checkbox"/> Clinical data                          |

### Methods

| n/a                                 | Involvement in the study                        |
|-------------------------------------|-------------------------------------------------|
| <input checked="" type="checkbox"/> | <input type="checkbox"/> ChIP-seq               |
| <input checked="" type="checkbox"/> | <input type="checkbox"/> Flow cytometry         |
| <input checked="" type="checkbox"/> | <input type="checkbox"/> MRI-based neuroimaging |

## Antibodies

### Antibodies used

Western Blot:  
Iba1 (Abcam ab17884, 1:1000),  
GFAP (Cell Signaling 12389, 1:1000),  
ICAM1 (Abcam ab179707, 1:750),  
GAPDH (Novus Biologicals NB600-502FR).

Immunofluorescence:  
laminin (Rabbit, Abcam ab11575),  
ZO-1 (Rabbit, ThermoFisher61-7300),  
ICAM1 (Rabbit, Abcam ab179707),  
P-selectin (Mouse, Abcam ab6632),  
Ly6g (Rat, Abcam ab25377),  
MAP2 (Rabbit, Cell Signaling87075; Mouse, Abcam ab11267),  
p24 (Human, NIH AIDS Reagent Program 530),  
Iba1 (Goat, Abcam ab5076),  
GFAP (Rabbit, Cell Signaling 12389),  
CD31 (Mouse, Abcam ab24590),  
Tmem119 (Rabbit, Abcam ab209064)

### Validation

Western Blot:  
Iba1 (Abcam ab178846, 1:1000): Tested by manufacturer to work with the application and species used. In house evaluation

using positive cells lines or tissues. 20 references.  
 GFAP (Cell Signaling 12389, 1:1000), Tested by manufacturer to work with the application and species used. In house evaluation using positive cells lines or tissues. 27 references  
 ICAM1 (Abcam ab179707, 1:750), Tested by manufacturer to work with the application and species used. In house evaluation using positive cells lines or tissues. 2 references.  
 GAPDH (Novus Biologicals NB600-502FR). 33 references

#### Immunofluorescence:

laminin (Rabbit, Abcam ab11575), Tested by manufacturer to work with the application and species used. In house evaluation using positive cells lines or tissues. 245 references.  
 ZO-1 (Rabbit, ThermoFisher 61-7300), Tested by manufacturer to work with the application and species used. In house evaluation using positive cells lines or tissues. 684 references  
 ICAM1 (Rabbit, Abcam ab179707), Tested by manufacturer to work with the application and species used. In house evaluation using positive cells lines or tissues. 2 references  
 P-selectin (Mouse , Abcam ab6632), Tested by manufacturer to work with the application and species used. In house evaluation using positive cells lines or tissues. 7 references  
 Ly6g (Rat, Abcam ab25377), Tested by manufacturer to work with the application and species used. In house evaluation using positive cells lines or tissues. 51 references  
 MAP2 (Rabbit, Cell Signaling 87075; Mouse, Abcam ab11267), Tested by manufacturer to work with the application and species used. In house evaluation using positive cells lines or tissues. CS: 12 references; Ab: 74 references.  
 p24 (Human, NIH AIDS Reagent Program 530), Hybridoma isolated antibody. This antibody reacts with HIV lysate in ELISA. It reacts with the p55 core precursor as well as p24 and several intermediates as determined by Western blot. The antibody stains the cytoplasm of HIV infected cell lines. Validated in our laboratory by comparing mock and infected cell lysates for western blot and immunofluorescence. Isolation reference: Gorny, M. K., Gianakakos, V., Sharpe, S., & Zolla-Pazner, S. (1989). Generation of human monoclonal antibodies to human immunodeficiency virus. Proc Natl Acad Sci U S A, 86(5), 1624-1628.  
 Iba1 (Goat , Abcam ab5076), Tested by manufacturer to work with the application and species used. In house evaluation using positive cells lines or tissues. 316 references  
 GFAP (Rabbit, Cell Signaling 12389), Tested by manufacturer to work with the application and species used. In house evaluation using positive cells lines or tissues.  
 CD31 (Mouse, Abcam ab24590), Tested by manufacturer to work with the application and species used. In house evaluation using positive cells lines or tissues. 68 references  
 Tmem119 (Rabbit, Abcam ab209064) Tested by manufacturer to work with the application and species used. In house evaluation using positive cells lines or tissues. 8 references

## Animals and other organisms

Policy information about [studies involving animals](#); [ARRIVE guidelines](#) recommended for reporting animal research

### Laboratory animals

Mice, C57BL6J, 12 weeks old

### Wild animals

*Provide details on animals observed in or captured in the field; report species, sex and age where possible. Describe how animals were caught and transported and what happened to captive animals after the study (if killed, explain why and describe method; if released, say where and when) OR state that the study did not involve wild animals.*

### Field-collected samples

*For laboratory work with field-collected samples, describe all relevant parameters such as housing, maintenance, temperature, photoperiod and end-of-experiment protocol OR state that the study did not involve samples collected from the field.*

### Ethics oversight

Manipulations were conducted in accordance to IACUC approved protocol (18-009). Facilities are AAALAC certified.

Note that full information on the approval of the study protocol must also be provided in the manuscript.
